# Supplementary material for: Chromium(iii) oxidation by biogenic manganese oxides with varying structural ripening
Source: Royal Society of Chemistry journal article supplement (doi:10.1039/c4em00077c), 2014-01-01
Supplement: c4em00077c1.pdf [file c4em00077c1.pdf]

## Supporting Information

### **Cr(III) Oxidation by Biogenic Manganese Oxides of Varying Structural Ripening**

Yuanzhi Tang, Samuel M Webb, Emily R Estes, Colleen M Hansel

Table S1. LCF fitting results of the unreacted Mn oxides at different age.

| <b>Mn oxide age (h)</b> | <b><math>\delta</math>-MnO<sub>2</sub> (hexagonal)</b> | <b>Na-birnessite (triclinic)</b> | <b>R factor*</b> |
|-------------------------|--------------------------------------------------------|----------------------------------|------------------|
| 4                       | 1                                                      | 0                                | 0.08             |
| 31                      | 0.87                                                   | 0.13                             | 0.08             |
| 96                      | 0.864                                                  | 0.136                            | 0.04             |
| 211                     | 0.559                                                  | 0.441                            | 0.02             |

\*R factor represents the goodness of fit.

Table S2. Summary of Mn K-edge EXAFS fitting parameters using the full multiple scattering model for reference compounds and bioMnOx before and after interaction with Cr(III).

| Sample *                 | R      | $f_{occ}$ | $\beta$ (a-axis) | $\beta$ (b-axis) | Shell          | CN  | Distance (Å) |         | $\sigma^2$ |          |  |
|--------------------------|--------|-----------|------------------|------------------|----------------|-----|--------------|---------|------------|----------|--|
| <i>Unreacted bioMnOx</i> |        |           |                  |                  |                |     |              |         |            |          |  |
| 4 h oxide                | 0.0354 | 0.64 (3)  | 0 (1)            | 0                | Mn-O           | 4   | 1.89         | +/-0.08 | 0.014      | +/-0.004 |  |
|                          |        |           |                  |                  | Mn-O           | 2   | 1.90         | +/-0.04 | 0.003      |          |  |
|                          |        |           |                  |                  | Mn-Mn edge     | 2   | 2.83         | +/-0.03 | 0.005      | +/-0.004 |  |
|                          |        |           |                  |                  | Mn-Mn edge     | 4   | 2.89         | +/-0.03 |            |          |  |
|                          |        |           |                  |                  | Mn-O           | 4   | 3.64         | +/-0.22 | 0.004      | +/-0.002 |  |
|                          |        |           |                  |                  | Mn-O           | 2   | 4.48         | +/-0.41 |            |          |  |
|                          |        |           |                  |                  | Mn-Mn corner   | 3.2 | +/-0.1       | 3.51    | +/-0.11    | 0.005    |  |
|                          |        |           |                  |                  | Mn- interlayer | 0.9 | +/-0.3       | 4.04    | +/-0.30    | 0.006    |  |
|                          |        |           |                  |                  | Mn-O           | 4   | 4.77         | +/-0.31 | 0.014      | +/-0.044 |  |
|                          |        |           |                  |                  | Mn-O           | 8   | 4.77         |         |            |          |  |
|                          |        |           |                  |                  | Mn-Mn diag     | 4   | 4.97         | +/-0.26 | 0.005      | +/-0.019 |  |
|                          |        |           |                  |                  | Mn-Mn diag     | 2   | 5.13         | +/-0.45 |            |          |  |
|                          |        |           |                  |                  | Mn-Mn next     | 2   | 5.67         |         | 0.424      |          |  |
|                          |        |           |                  |                  | Mn-Mn next     | 4   | 5.78         |         |            |          |  |
| 31 h oxide               | 0.0359 | 0.92 (4)  | 2 (4)            | 0                | Mn-O           | 4   | 1.89         | +/-0.11 | 0.008      | +/-0.005 |  |
|                          |        |           |                  |                  | Mn-O           | 2   | 1.91         | +/-0.10 | 0.003      |          |  |
|                          |        |           |                  |                  | Mn-Mn edge     | 2   | 2.83         | +/-0.03 | 0.007      | +/-0.004 |  |
|                          |        |           |                  |                  | Mn-Mn edge     | 4   | 2.89         | +/-0.03 |            |          |  |
|                          |        |           |                  |                  | Mn-O           | 4   | 3.71         | +/-0.10 | 0.005      | +/-0.011 |  |
|                          |        |           |                  |                  | Mn-O           | 2   | 4.48         | +/-0.30 |            |          |  |
|                          |        |           |                  |                  | Mn-Mn corner   | 3.2 | +/-1.5       | 3.56    | +/-0.07    | 0.005    |  |
|                          |        |           |                  |                  | Mn- interlayer | 2.9 | +/-0.8       | 4.11    | +/-0.13    | 0.006    |  |
|                          |        |           |                  |                  | Mn-O           | 4   | 4.76         | +/-0.20 | 0.011      | +/-0.065 |  |
|                          |        |           |                  |                  | Mn-O           | 8   | 4.76         |         |            |          |  |
|                          |        |           |                  |                  | Mn-Mn diag     | 4   | 5.00         | +/-0.30 | 0.010      | +/-0.300 |  |
|                          |        |           |                  |                  | Mn-Mn diag     | 2   | 5.06         | +/-0.43 |            |          |  |
|                          |        |           |                  |                  | Mn-Mn next     | 2   | 5.67         |         | 0.424      |          |  |
|                          |        |           |                  |                  | Mn-Mn next     | 4   | 5.78         |         |            |          |  |
| 96 h oxide               | 0.0134 | 0.88 (3)  | 7 (4)            | 0                | Mn-O           | 4   | 1.88         | +/-0.11 | 0.006      | +/-0.008 |  |
|                          |        |           |                  |                  | Mn-O           | 2   | 1.91         | +/-0.15 | 0.003      |          |  |
|                          |        |           |                  |                  | Mn-Mn edge     | 2   | 2.82         | +/-0.02 | 0.005      | +/-0.003 |  |
|                          |        |           |                  |                  | Mn-Mn edge     | 4   | 2.90         | +/-0.02 |            |          |  |
|                          |        |           |                  |                  | Mn-O           | 4   | 3.63         | +/-0.25 | 0.012      | +/-0.064 |  |
|                          |        |           |                  |                  | Mn-O           | 2   | 4.39         | +/-0.75 |            |          |  |
|                          |        |           |                  |                  | Mn-Mn corner   | 1.7 | +/-0.9       | 3.52    | +/-0.11    | 0.005    |  |
|                          |        |           |                  |                  | Mn- interlayer | 1.3 | +/-0.8       | 4.05    | +/-0.20    | 0.006    |  |
|                          |        |           |                  |                  | Mn-O           | 4   | 4.75         | +/-0.20 | 0.016      | +/-0.036 |  |
|                          |        |           |                  |                  | Mn-O           | 8   | 4.75         |         |            |          |  |
|                          |        |           |                  |                  | Mn-Mn diag     | 4   | 4.97         | +/-0.12 | 0.006      | +/-0.014 |  |
|                          |        |           |                  |                  | Mn-Mn diag     | 2   | 5.13         | +/-0.25 |            |          |  |
|                          |        |           |                  |                  | Mn-Mn next     | 2   | 5.63         |         | 0.424      |          |  |
|                          |        |           |                  |                  | Mn-Mn next     | 4   | 5.80         |         |            |          |  |

|            |        |          |       |   |                |     |        |         |         |          |  |
|------------|--------|----------|-------|---|----------------|-----|--------|---------|---------|----------|--|
| 211h oxide | 0.0318 | 0.66 (3) | 7 (3) | 0 | Mn-O           | 4   | 1.88   | +/-0.09 | 0.009   | +/-0.006 |  |
|            |        |          |       |   | Mn-O           | 2   | 1.91   | +/-0.07 | 0.003   |          |  |
|            |        |          |       |   | Mn-Mn edge     | 2   | 2.83   | +/-0.03 | 0.004   | +/-0.004 |  |
|            |        |          |       |   | Mn-Mn edge     | 4   | 2.90   | +/-0.03 |         |          |  |
|            |        |          |       |   | Mn-O           | 4   | 3.65   | +/-0.26 | 0.006   | +/-0.047 |  |
|            |        |          |       |   | Mn-O           | 2   | 4.42   | +/-0.46 |         |          |  |
|            |        |          |       |   | Mn-Mn corner   | 1.4 | +/-1.0 | 3.50    | +/-0.15 | 0.005    |  |
|            |        |          |       |   | Mn- interlayer | 2.4 | +/-1.5 | 4.07    | +/-0.24 | 0.006    |  |
|            |        |          |       |   | Mn-O           | 4   | 4.75   | +/-0.36 | 0.023   | +/-0.114 |  |
|            |        |          |       |   | Mn-O           | 8   | 4.75   |         |         |          |  |
|            |        |          |       |   | Mn-Mn diag     | 4   | 4.99   | +/-0.52 | 0.011   | +/-0.371 |  |
|            |        |          |       |   | Mn-Mn diag     | 2   | 5.03   | +/-0.27 |         |          |  |
|            |        |          |       |   | Mn-Mn next     | 2   | 5.65   |         | 0.424   |          |  |
|            |        |          |       |   | Mn-Mn next     |     | 5.80   |         |         |          |  |

---

***Reacted bioMnOx***

---

|         |        |          |        |   |                |     |        |         |         |          |  |
|---------|--------|----------|--------|---|----------------|-----|--------|---------|---------|----------|--|
| 4 h-K-L | 0.0119 | 0.80 (5) | 13 (2) | 0 | Mn-O           | 4   | 1.87   | +/-0.06 | 0.006   | +/-0.006 |  |
|         |        |          |        |   | Mn-O           | 2   | 1.92   | +/-0.07 | 0.001   |          |  |
|         |        |          |        |   | Mn-Mn edge     | 2   | 2.82   | +/-0.04 | 0.004   | +/-0.003 |  |
|         |        |          |        |   | Mn-Mn edge     | 4   | 2.91   | +/-0.02 |         |          |  |
|         |        |          |        |   | Mn-O           | 4   | 3.45   | +/-0.10 | 0.008   | +/-0.014 |  |
|         |        |          |        |   | Mn-O           | 2   | 4.26   | +/-0.72 |         |          |  |
|         |        |          |        |   | Mn-Mn corner   | 1.4 | +/-1.1 | 3.75    | +/-0.07 | 0.005    |  |
|         |        |          |        |   | Mn- interlayer | 1.5 | +/-1.6 | 4.38    | +/-0.45 | 0.006    |  |
|         |        |          |        |   | Mn-O           | 4   | 4.60   | +/-0.26 | 0.000   | +/-0.031 |  |
|         |        |          |        |   | Mn-O           | 8   | 4.80   | +/-0.13 |         |          |  |
|         |        |          |        |   | Mn-Mn diag     | 4   | 5.02   | +/-0.12 | 0.000   | +/-0.021 |  |
|         |        |          |        |   | Mn-Mn diag     | 2   | 5.20   | +/-0.22 |         |          |  |
|         |        |          |        |   | Mn-Mn next     | 2   | 5.64   |         | 0.424   |          |  |
|         |        |          |        |   | Mn-Mn next     | 4   | 5.83   |         |         |          |  |

|           |        |          |        |   |                |     |        |         |         |          |  |
|-----------|--------|----------|--------|---|----------------|-----|--------|---------|---------|----------|--|
| 4 h-ASW-D | 0.0203 | 0.78 (5) | 24 (5) | 0 | Mn-O           | 4   | 1.89   | +/-0.07 | 0.006   | +/-0.008 |  |
|           |        |          |        |   | Mn-O           | 2   | 1.93   | +/-0.08 | 0.001   |          |  |
|           |        |          |        |   | Mn-Mn edge     | 2   | 2.88   | +/-0.13 | 0.006   | +/-0.005 |  |
|           |        |          |        |   | Mn-Mn edge     | 4   | 2.92   | +/-0.06 |         |          |  |
|           |        |          |        |   | Mn-O           | 4   | 3.53   | +/-0.15 | 0.009   | +/-0.020 |  |
|           |        |          |        |   | Mn-O           | 2   | 4.14   | +/-0.92 |         |          |  |
|           |        |          |        |   | Mn-Mn corner   | 1.8 | +/-0.7 | 3.80    | +/-0.15 | 0.005    |  |
|           |        |          |        |   | Mn- interlayer | 1.5 | +/-1.5 | 4.34    | +/-0.34 | 0.006    |  |
|           |        |          |        |   | Mn-O           | 4   | 4.68   | +/-0.17 | 0.001   | +/-0.030 |  |
|           |        |          |        |   | Mn-O           | 8   | 4.87   | +/-0.16 |         |          |  |
|           |        |          |        |   | Mn-Mn diag     | 4   | 5.08   | +/-0.18 | 0.000   | +/-0.025 |  |
|           |        |          |        |   | Mn-Mn diag     | 2   | 5.24   | +/-0.26 |         |          |  |
|           |        |          |        |   | Mn-Mn next     | 2   | 5.75   |         | 0.424   |          |  |
|           |        |          |        |   | Mn-Mn next     | 4   | 5.83   |         |         |          |  |

|           |       |          |        |   |                |     |        |         |         |          |  |
|-----------|-------|----------|--------|---|----------------|-----|--------|---------|---------|----------|--|
| 4 h-ASW-L | 0.008 | 0.99 (7) | 22 (7) | 0 | Mn-O           | 4   | 1.87   | +/-0.04 | 0.006   | +/-0.005 |  |
|           |       |          |        |   | Mn-O           | 2   | 1.92   | +/-0.05 | 0.001   |          |  |
|           |       |          |        |   | Mn-Mn edge     | 2   | 2.86   | +/-0.32 | 0.007   | +/-0.013 |  |
|           |       |          |        |   | Mn-Mn edge     | 4   | 2.91   | +/-0.13 |         |          |  |
|           |       |          |        |   | Mn-O           | 4   | 3.53   | +/-0.08 | 0.009   | +/-0.013 |  |
|           |       |          |        |   | Mn-O           | 2   | 4.42   | +/-2.00 |         |          |  |
|           |       |          |        |   | Mn-Mn corner   | 0.3 | +/-0.9 | 3.80    | +/-0.07 | 0.005    |  |
|           |       |          |        |   | Mn- interlayer | 1.2 | +/-1.0 | 4.40    | +/-0.33 | 0.006    |  |
|           |       |          |        |   | Mn-O           | 4   | 4.60   | +/-0.23 | 0.000   | +/-0.022 |  |
|           |       |          |        |   | Mn-O           | 8   | 4.79   | +/-0.10 |         |          |  |
|           |       |          |        |   | Mn-Mn diag     | 4   | 5.01   | +/-0.11 | 0.002   | +/-0.016 |  |
|           |       |          |        |   | Mn-Mn diag     | 2   | 5.17   | +/-0.18 |         |          |  |
|           |       |          |        |   | Mn-Mn next     | 2   | 5.72   |         | 0.424   |          |  |
|           |       |          |        |   | Mn-Mn next     | 4   | 5.83   |         |         |          |  |

|                |        |          |         |         |                |        |          |         |         |          |   |
|----------------|--------|----------|---------|---------|----------------|--------|----------|---------|---------|----------|---|
| 4 h-K-D        | 0.0113 | 0.95 (6) | 27 (7)  | 0       | Mn-O           | 4      | 1.88     | +/-0.05 | 0.007   | +/-0.005 |   |
|                |        |          |         |         | Mn-O           | 2      | 1.92     | +/-0.05 | 0.001   |          |   |
|                |        |          |         |         | Mn-Mn edge     | 2      | 2.87     | +/-0.06 | 0.008   | +/-0.003 |   |
|                |        |          |         |         | Mn-Mn edge     | 4      | 2.91     | +/-0.03 |         |          |   |
|                |        |          |         |         | Mn-O           | 4      | 3.53     | +/-0.10 | 0.009   | +/-0.016 |   |
|                |        |          |         |         | Mn-O           | 2      | 4.38     | +/-4.37 |         |          |   |
|                |        |          |         |         | Mn-Mn corner   | 0.9    | +/-0.8   | 3.79    | +/-0.09 | 0.005    |   |
|                |        |          |         |         | Mn- interlayer | 1.1    | +/-1.3   | 4.42    | +/-0.41 | 0.006    |   |
|                |        |          |         |         | Mn-O           | 4      | 4.62     | +/-0.45 | 0.002   | +/-0.042 |   |
|                |        |          |         |         | Mn-O           | 8      | 4.81     | +/-0.11 |         |          |   |
|                |        |          |         |         | Mn-Mn diag     | 4      | 5.02     | +/-0.15 | 0.000   | +/-0.022 |   |
|                |        |          |         |         | Mn-Mn diag     | 2      | 5.20     | +/-0.17 |         |          |   |
|                |        |          |         |         | Mn-Mn next     | 2      | 5.74     |         | 0.424   |          |   |
|                |        |          |         |         | Mn-Mn next     | 4      | 5.82     |         |         |          |   |
|                |        |          |         |         | 31 h-K-L       | 0.0099 | 0.89 (7) | 16 (3)  | 0       | Mn-O     | 4 |
| Mn-O           | 2      | 1.92     | +/-0.06 | 0.001   |                |        |          |         |         |          |   |
| Mn-Mn edge     | 2      | 2.84     | +/-0.05 | 0.005   |                |        |          |         |         | +/-0.004 |   |
| Mn-Mn edge     | 4      | 2.91     | +/-0.03 |         |                |        |          |         |         |          |   |
| Mn-O           | 4      | 3.51     | +/-0.07 | 0.007   |                |        |          |         |         | +/-0.003 |   |
| Mn-O           | 2      | 4.37     | +/-2.75 |         |                |        |          |         |         |          |   |
| Mn-Mn corner   | 0.0    | +/-1.0   | 3.79    | +/-0.08 |                |        |          |         |         | 0.005    |   |
| Mn- interlayer | 1.2    | +/-1.1   | 4.46    | +/-0.65 |                |        |          |         |         | 0.006    |   |
| Mn-O           | 4      | 4.57     | +/-0.57 | 0.000   |                |        |          |         |         | +/-0.034 |   |
| Mn-O           | 8      | 4.79     | +/-0.23 |         |                |        |          |         |         |          |   |
| Mn-Mn diag     | 4      | 5.01     | +/-0.17 | 0.000   |                |        |          |         |         | +/-0.013 |   |
| Mn-Mn diag     | 2      | 5.18     | +/-0.20 |         |                |        |          |         |         |          |   |
| Mn-Mn next     | 2      | 5.68     |         | 0.424   |                |        |          |         |         |          |   |
| Mn-Mn next     | 4      | 5.83     |         |         |                |        |          |         |         |          |   |
| 31 h-ASW-D     | 0.0162 | 0.82 (8) | 27 (6)  | 0       |                |        |          |         |         | Mn-O     | 4 |
|                |        |          |         |         | Mn-O           | 2      | 1.92     | +/-0.07 | 0.001   |          |   |
|                |        |          |         |         | Mn-Mn edge     | 2      | 2.87     | +/-0.07 | 0.006   | +/-0.004 |   |
|                |        |          |         |         | Mn-Mn edge     | 4      | 2.91     | +/-0.03 |         |          |   |
|                |        |          |         |         | Mn-O           | 4      | 3.54     | +/-0.12 | 0.010   | +/-0.004 |   |
|                |        |          |         |         | Mn-O           | 2      | 4.31     | +/-1.38 |         |          |   |
|                |        |          |         |         | Mn-Mn corner   | 1.2    | +/-1.3   | 3.80    | +/-0.10 | 0.005    |   |
|                |        |          |         |         | Mn- interlayer | 1.1    | +/-1.3   | 4.38    | +/-0.80 | 0.006    |   |
|                |        |          |         |         | Mn-O           | 4      | 4.62     | +/-0.42 | 0.000   | +/-0.036 |   |
|                |        |          |         |         | Mn-O           | 8      | 4.82     | +/-0.22 |         |          |   |
|                |        |          |         |         | Mn-Mn diag     | 4      | 5.04     | +/-0.16 | 0.000   | +/-0.020 |   |
|                |        |          |         |         | Mn-Mn diag     | 2      | 5.20     | +/-0.22 |         |          |   |
|                |        |          |         |         | Mn-Mn next     | 2      | 5.74     |         | 0.424   |          |   |
|                |        |          |         |         | Mn-Mn next     | 4      | 5.83     |         |         |          |   |
|                |        |          |         |         | 211 h-K-L      | 0.0127 | 0.80 (5) | 16 (4)  | 0       | Mn-O     | 4 |
| Mn-O           | 2      | 1.92     | +/-0.05 | 0.001   |                |        |          |         |         |          |   |
| Mn-Mn edge     | 2      | 2.81     | +/-0.05 | 0.004   |                |        |          |         |         | +/-0.005 |   |
| Mn-Mn edge     | 4      | 2.92     | +/-0.02 |         |                |        |          |         |         |          |   |
| Mn-O           | 4      | 3.49     | +/-0.21 | 0.015   |                |        |          |         |         | +/-0.048 |   |
| Mn-O           | 2      | 4.23     | +/-2.63 |         |                |        |          |         |         |          |   |
| Mn-Mn corner   | 1.8    | +/-1.3   | 3.76    | +/-0.20 |                |        |          |         |         | 0.005    |   |
| Mn- interlayer | 0.9    | +/-1.4   | 4.40    | +/-0.56 |                |        |          |         |         | 0.006    |   |
| Mn-O           | 4      | 4.64     | +/-0.81 | 0.001   |                |        |          |         |         | +/-0.062 |   |
| Mn-O           | 8      | 4.82     | +/-0.36 |         |                |        |          |         |         |          |   |
| Mn-Mn diag     | 4      | 5.03     | +/-0.25 | 0.000   |                |        |          |         |         | +/-0.037 |   |
| Mn-Mn diag     | 2      | 5.21     | +/-0.32 |         |                |        |          |         |         |          |   |
| Mn-Mn next     | 2      | 5.63     |         | 0.424   |                |        |          |         |         |          |   |
| Mn-Mn next     | 4      | 5.84     |         |         |                |        |          |         |         |          |   |

|             |        |          |        |   |                |     |        |      |         |       |          |
|-------------|--------|----------|--------|---|----------------|-----|--------|------|---------|-------|----------|
| 211 h-ASW-D | 0.0132 | 0.80 (7) | 17 (4) | 0 | Mn-O           | 4   |        | 1.88 | +/-0.05 | 0.006 | +/-0.006 |
|             |        |          |        |   | Mn-O           | 2   |        | 1.92 | +/-0.06 | 0.001 |          |
|             |        |          |        |   | Mn-Mn edge     | 2   |        | 2.83 | +/-0.06 | 0.004 | +/-0.005 |
|             |        |          |        |   | Mn-Mn edge     | 4   |        | 2.92 | +/-0.02 |       |          |
|             |        |          |        |   | Mn-O           | 4   |        | 3.53 | +/-0.12 | 0.012 | +/-0.026 |
|             |        |          |        |   | Mn-O           | 2   |        | 4.23 | +/-1.10 |       |          |
|             |        |          |        |   | Mn-Mn corner   | 2.5 | +/-1.3 | 3.82 | +/-0.14 | 0.005 |          |
|             |        |          |        |   | Mn- interlayer | 1.2 | +/-0.8 | 4.43 | +/-0.55 | 0.006 |          |
|             |        |          |        |   | Mn-O           | 4   |        | 4.66 | +/-0.42 | 0.001 | +/-0.062 |
|             |        |          |        |   | Mn-O           | 8   |        | 4.83 | +/-0.23 |       |          |
|             |        |          |        |   | Mn-Mn diag     | 4   |        | 5.03 | +/-0.18 | 0.000 | +/-0.045 |
|             |        |          |        |   | Mn-Mn diag     | 2   |        | 5.19 | +/-0.29 |       |          |
|             |        |          |        |   | Mn-Mn next     | 2   |        | 5.66 |         | 0.424 |          |
|             |        |          |        |   | Mn-Mn next     | 4   |        | 5.84 |         |       |          |

---

**Reference compounds (as described in detail by Webb et al, 2005)**

---

|                            |        |          |        |       |              |     |        |      |         |       |          |
|----------------------------|--------|----------|--------|-------|--------------|-----|--------|------|---------|-------|----------|
| $\delta$ -MnO <sub>2</sub> | 0.0097 | 0.77 (8) | 0 (4)  | 0 (4) | Mn-Mn corner | 0.6 | +/-1.0 | 3.42 | +/-0.05 | 0.005 | +/-0.004 |
| Triclinic birnessite       | 0.0145 | 0.90 (8) | 15 (5) | 0 (5) | Mn-Mn corner | 0.8 | +/-0.8 | 3.36 | +/-0.09 | 0.006 | +/-0.003 |

---

\* Samples are labeled as bioMnOx age-organic carbon content-light condition. Organic carbon contents include carbon-replete (K) and -deplete (ASW) conditions. Light conditions include light (L) and dark (D).

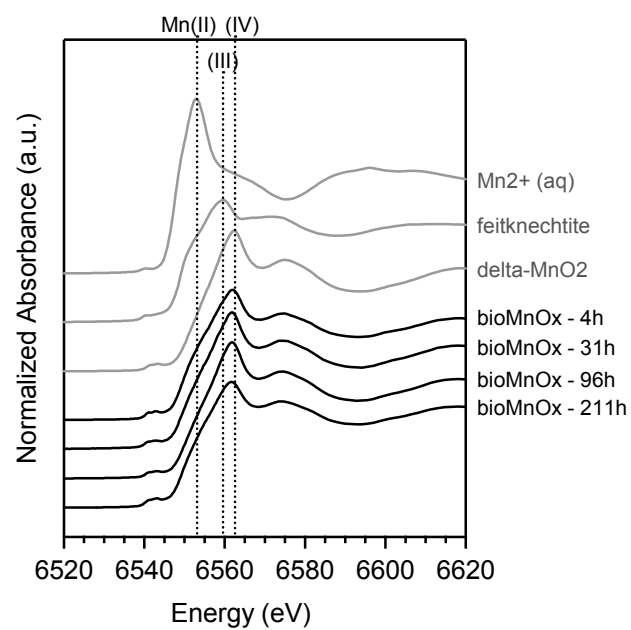

Figure S1. Mn K-edge XANES spectra of reference compounds in grey lines and unreacted Mn oxides (4, 31, 96, and 211 h old) in black lines.

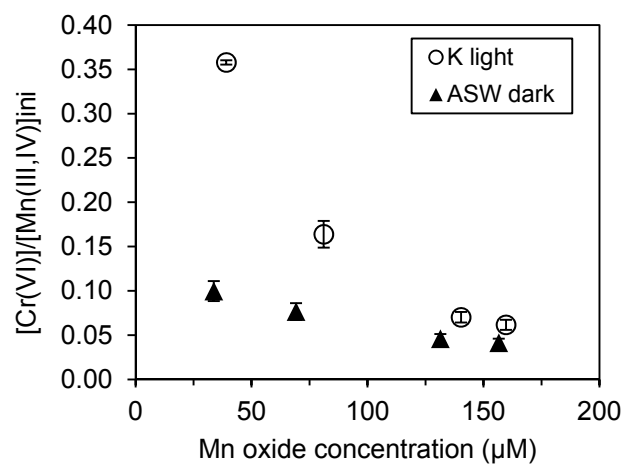

Figure S2. Cr oxidation capacity as a function of biogenic Mn oxide concentration in K medium-light or ASW-dark conditions. Reaction conditions: 4 h bioMnOx, pH 7.2.
